# Supplementary material for: Inhibitory Effect and Potential Mechanism of Lactobacillus plantarum YE4 against Dipeptidyl Peptidase-4
Source: MDPI journal article supplement (doi:10.3390/foods11010080), 2021-12-29
Supplement: s1 [file s1]

**Table S1:** Source information of lactic acid bacteria (LAB) strains.

| System number     | Strain number | Species                         | Source          |
|-------------------|---------------|---------------------------------|-----------------|
| 2017SWU.B05.05015 | M9            | <i>Lactobacillus. plantarum</i> | Pickles isolate |
| 2017SWU.B05.05011 | M42           | <i>Lactobacillus. plantarum</i> | Pickles isolate |
| 2018SWU.B05.05007 | 26            | <i>Lactobacillus. plantarum</i> | Yogurt isolate  |
| 2019SWU.B05.06001 | 127           | <i>Lactobacillus. rhamnosus</i> | Yogurt isolate  |
| 2016SWU.B05.01002 | L2            | <i>Lactobacillus. casei</i>     | Qula isolate    |
| 2018SWU.B05.08004 | YE4           | <i>Lactobacillus. plantarum</i> | Qula isolate    |
| 2014SWU.B05.02001 | 212           | <i>Lactobacillus. fermentum</i> | Pickles isolate |
| 2017SWU.B05.01001 | R25           | <i>Lactobacillus. casei</i>     | Pickles isolate |
| 2017SWU.B05.17001 | P5            | <i>Lactobacillus. pentosus</i>  | Pickles isolate |
| 2018SWU.B05.02019 | H131          | <i>Lactobacillus. fermentum</i> | Yogurt isolate  |
| 2018SWU.B05.05005 | H130          | <i>Lactobacillus. plantarum</i> | Yogurt isolate  |
| 2018SWU.B05.05004 | H129          | <i>Lactobacillus. plantarum</i> | Yogurt isolate  |

**Table S2:** Sequences of real-time quantitative PCR (qRT-PCR) primers used in this study.

| Primer name | Accession number | Forward primer (5'to3')  | Reverse primer (5'to3')  |
|-------------|------------------|--------------------------|--------------------------|
| NFkBIA      | NM_020529.3      | CGCCCAAGCACCCGGATACAGC   | TTCAGCCCCTTTGCACTCATAACG |
| CFLAR       | NM_001351591.2   | CTGTCCTTGTTCTCGTCCC      | ATAGCAACATCCCGGCACAA     |
| ATF4        | NM_001675.4      | GTTTTGGATTGGTGGGGTGC     | GTATTGCCCCCTCCCTGCTT     |
| CREB3L3     | NM_001271997.2   | GACCTGCAACAGCATCACCT     | TCTTCTCGGGTTGTGTCAGC     |
| Tnfaip3     | NM_001270507.2   | GCCAAGAGAGATCACACCCC     | TTCGTTTTTCAGCGCCACAAG    |
| JunB        | NM_002229.3      | CCTACCGGAGTCTCAAAGCG     | TTGGTGTAACCGGAGGTGG      |
| IRAK1       | NM_001025242.2   | TTGAGAAGCACCCAGAGCAC     | GCCAGCTTCTGGACCATCTT     |
| FLNA        | NM_001110556.2   | ACAGTGTCAATCGGAGGTCAC    | AAGCGCACACAGATGACGTA     |
| STMN1       | NM_001145454.3   | ACTGGAACGTTTGCGAGAGA     | ATCAATGCAGATTGGAGGCCC    |
| HSPA1A      | NM_005345.6      | AGCTGGAGCAGGTGTGTAAC     | CAGCAATCTTGAAAGGCCC      |
| HSPA1B      | NM_005346.6      | CTGGAGCAGGTGTGTAACCC     | AGCAGCAAAGTCCTTGAGTCC    |
| DUSP1       | NM_004417.4      | CAGAGCCCCATTACGACCTC     | CCAGAGGAACTCGGGTGAAG     |
| DDIT3       | NM_004083.6      | TTGCCTTTCTCCTTCGGGAC     | CAGTCAGCCAAGCCAGAGAA     |
| MYC         | NM_001354870.1   | TACACTAACATCCCACGCTCTG   | TTCTCTGCTGCTCCTCCGTA     |
| NR4A1       | NM_001202233.2   | TTCCTGGTGTAAGCTTTGGTATGG | ACTCTGGATGGACCAACAGG     |
| GAPDH       | NM_001357943.2   | GGGCTGCTTTTAACTCTGGT     | TGGCAGGTTTTTCTAGACGG     |
| DPP-4       | XM_003820939.3   | CGGAGTCCTGGGTTTCAGTT     | CCTCCAACCTCACGTGGAC      |
| PpiA        | XM_007981418.2   | TGCTGACTGTGGACAACTCG     | TGCAGCGAGAGCACAAAGAT     |

**Table S3:** Quality of the RNA-sequence data of each sample. CFE, treatment group after YE4-CFE interacted with Caco-2 cells; CTL, control group.

| Sample | Raw reads(bp) | Clean reads(bp) | Q20 (%) | Q30 (%) |
|--------|---------------|-----------------|---------|---------|
| CFE-1  | 8495256900    | 8348818788      | 97.79%  | 93.68%  |
| CFE-2  | 7162500900    | 7057336417      | 97.73%  | 93.55%  |
| CFE-3  | 7621356900    | 7491625117      | 97.58%  | 93.22%  |
| CTL-1  | 6556791300    | 6468598771      | 97.53%  | 93.16%  |
| CTL-2  | 7233822000    | 7134179679      | 97.71%  | 93.48%  |
| CTL-3  | 7041612300    | 6924493214      | 97.55%  | 93.18%  |

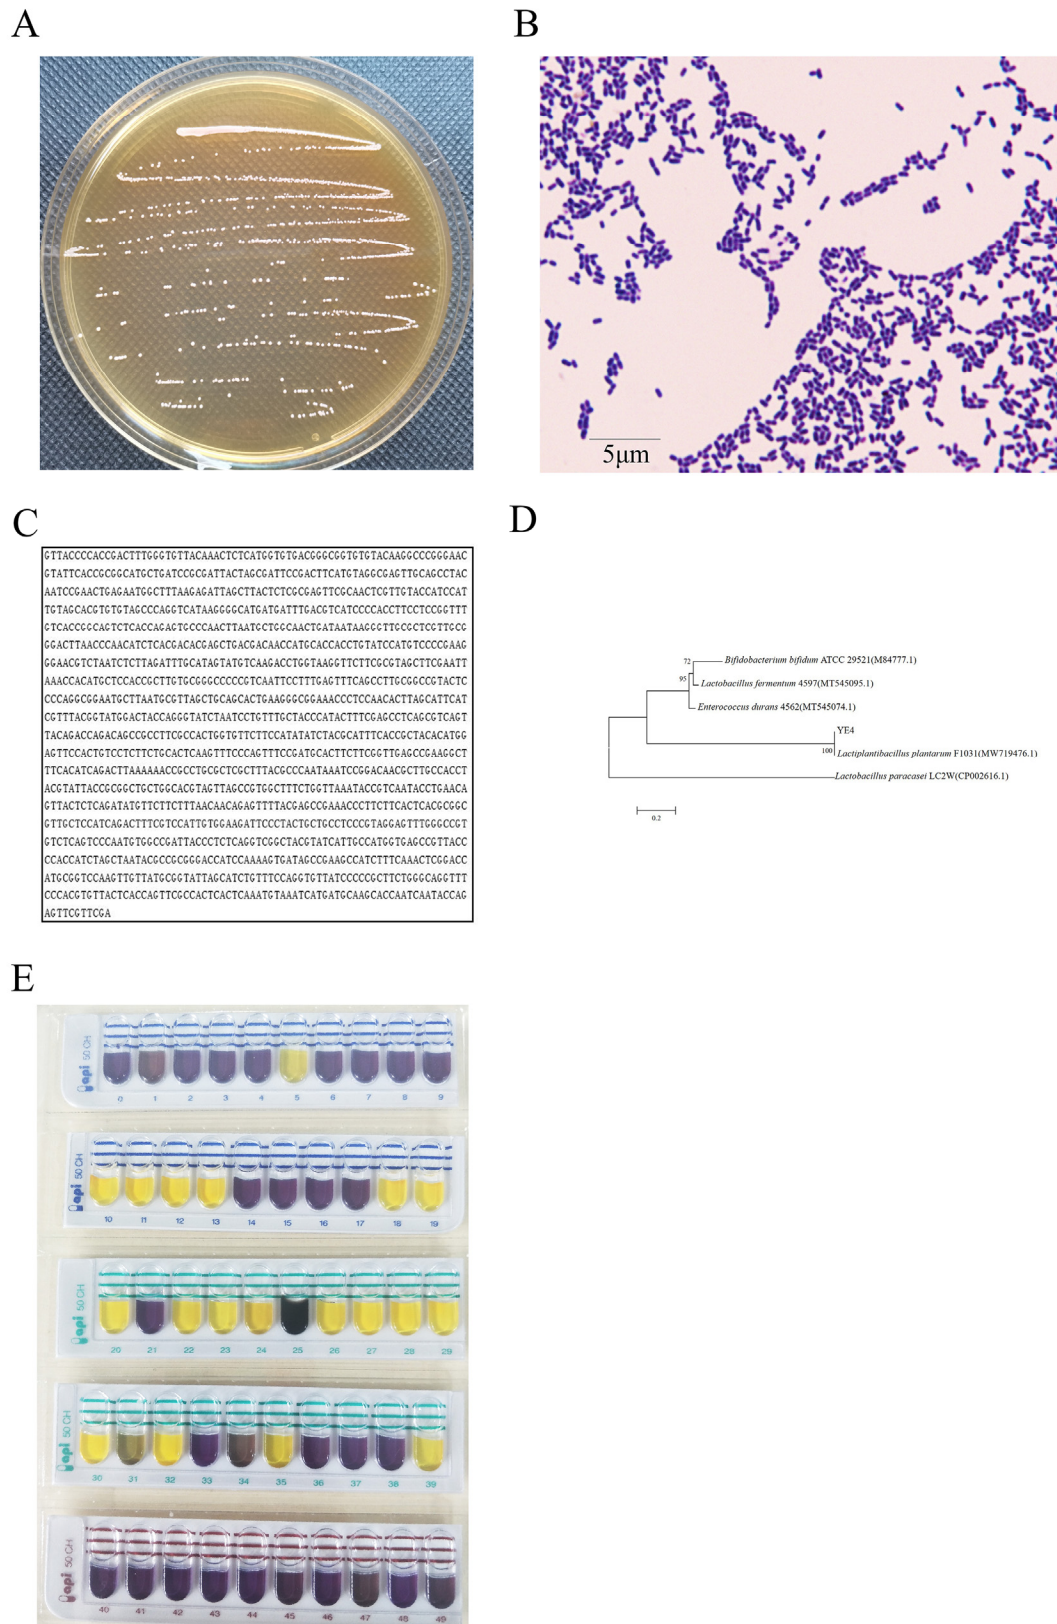

**Figure S1:** Identification of the *Lactobacillus plantarum* (*L. plantarum*) YE4 strain. (A) Colonial morphology of *L. plantarum* YE4. (B) Gram staining of *L. plantarum* YE4. (C) Sequence of the

16S rDNA gene of *L. plantarum* YE4. (D) Phylogenetic tree of *L. plantarum* YE4. (E) Test results of API 50CH kit for *L. plantarum* YE4.
